# Supplementary material for: Immune checkpoint inhibition therapy for advanced skin cancer in patients with concomitant hematological malignancy: a retrospective multicenter DeCOG study of 84 patients
Source: PubMed Central journal article supplement — J Immunother Cancer. 2020 Oct 22;8(2):e000897. doi: 10.1136/jitc-2020-000897 (PMC7583786; doi:10.1136/jitc-2020-000897), 2020-10-22
Supplement: jitc-2020-000897supp001.pdf [file jitc-2020-000897supp001.pdf]

**SUPPLEMENTARY MATERIALS to the original article****Immune checkpoint inhibition therapy for advanced skin cancer in patients with concomitant hematologic malignancy: a retrospective multicenter DeCOG study of 84 patients**

**Ulrike Leiter<sup>1</sup>, Carmen Loquai<sup>2</sup>, Lydia Reinhardt<sup>3</sup>, David Rafei-Shamsabadi<sup>4</sup>, Ralf Gutzmer<sup>5</sup>, Katharina Kähler<sup>6</sup>, Lucie Heinzerling<sup>7</sup>, Jessica C. Hassel<sup>8</sup>, Valerie Glutsch<sup>9</sup>, Judith Sirokay<sup>10</sup>, Nora Schlecht<sup>11</sup>, Albert Rübber<sup>12</sup>, Thilo Gambichler<sup>13</sup>, Kerstin Schatton<sup>14</sup>, Claudia Pföhler<sup>15</sup>, Cindy Franklin<sup>16</sup>, Patrick Terheyden<sup>17</sup>, Sebastian Haferkamp<sup>18</sup>, Peter Mohr<sup>19</sup>, Lena Bischof<sup>20</sup>, Elisabeth Livingstone<sup>20</sup>, Lisa Zimmer<sup>20</sup>, Michael Weichenthal<sup>6</sup>, Dirk Schadendorf<sup>20</sup>, Andreas Meiwes<sup>1</sup>, Ulrike Keim<sup>1</sup>, Claus Garbe<sup>1</sup>, Jürgen C. Becker<sup>20,21,22</sup>, Selma Ugurel<sup>20</sup>**

<sup>1</sup>Department of Dermatology, University Hospital Tübingen, Tübingen, Germany

<sup>2</sup>Department of Dermatology, University Hospital Mainz, Mainz, Germany

<sup>3</sup>Skin Cancer Center at the National Center for Tumor Diseases Dresden, Department of Dermatology, University Hospital Carl Gustav Carus, Dresden, Germany

<sup>4</sup>Department of Dermatology and Venereology, Medical Center, University of Freiburg, Freiburg, Germany

<sup>5</sup>Skin Cancer Center, Department of Dermatology and Allergy, Hannover Medical School, Hannover, Germany

<sup>6</sup>Department of Dermatology, University Hospital Kiel, Kiel, Germany

<sup>7</sup>Department of Dermatology, University Hospital Erlangen, Erlangen, Germany

<sup>8</sup>Department of Dermatology and National Center for Tumor Diseases, University Hospital Heidelberg, Heidelberg, Germany

<sup>9</sup>Department of Dermatology, University Hospital Würzburg, Würzburg, Germany

<sup>10</sup>Department of Dermatology, University Hospital Bonn, Bonn, Germany

<sup>11</sup>Department of Dermatology, Hospital Dortmund, Dortmund, Germany

<sup>12</sup>Department of Dermatology, University Hospital Aachen, Aachen, Germany

<sup>13</sup>Department of Dermatology, Ruhr-University Bochum, Bochum, Germany

<sup>14</sup>Department of Dermatology, Heinrich-Heine-University Medical Faculty, Düsseldorf, Germany

<sup>15</sup>Department of Dermatology, Saarland University Medical Center, Homburg/Saar, Germany

<sup>16</sup>Department of Dermatology, University Hospital Cologne, Cologne, Germany

<sup>17</sup>Department of Dermatology, University Hospital Lübeck, Lübeck, Germany

<sup>18</sup>Department of Dermatology, University Hospital Regensburg, Regensburg, Germany

<sup>19</sup>Department of Dermatology, Elbe-Klinikum Buxtehude, Buxtehude, Germany

<sup>20</sup>Department of Dermatology, University Hospital Essen, University of Duisburg-Essen, Essen, Germany

<sup>21</sup>German Cancer Research Center, Heidelberg, Germany

<sup>22</sup>Translational Skin Cancer Research, Deutsches Konsortium für Translationale Krebsforschung (DKTK), Essen, Germany

**TABLE S1. Comparison of characteristics in patients with concomitant hematologic malignancy**

|                                                   | <b>MM<br/>N (%)</b>       | <b>cSCC<br/>N (%)</b>     | <b>MCC<br/>N (%)</b>      | <b>P-value</b> |
|---------------------------------------------------|---------------------------|---------------------------|---------------------------|----------------|
| <b>Total</b>                                      | 52 (100%)                 | 15 (100%)                 | 17 (100%)                 |                |
| <b>Gender</b>                                     |                           |                           |                           | 0.78           |
| male                                              | 37 (71.2%)                | 12 (80%)                  | 12 (70.6%)                |                |
| female                                            | 15 (28.8%)                | 3 (20%)                   | 5 (29.4%)                 |                |
| <b>Age at diagnosis of skin cancer</b>            |                           |                           |                           | 0.28           |
| Median (IQR)                                      | 72.5 years<br>(59.0;76.0) | 76.0 years<br>(70.0;78.0) | 70.0 years<br>(63.0;78.5) |                |
| <b>Primary site of skin cancer</b>                |                           |                           |                           | 0.006          |
| head and neck                                     | 13 (23.1%)                | 13 (86.7%)                | 5 (29.4%)                 |                |
| trunk                                             | 21 (40.4%)                | 2 (13.3%)                 | 4 (23.5%)                 |                |
| extremities                                       | 12 (23.1%)                | 0 (0.0%)                  | 7 (41.2%)                 |                |
| mucosa                                            | 2 (3.8%)                  | 0 (0.0%)                  | 0 (0.0%)                  |                |
| unknown primary                                   | 4 (7.6%)                  | 0 (0.0%)                  | 1 (5.9%)                  |                |
| <b>Hematologic malignancy</b>                     |                           |                           |                           | 0.30           |
| CLL                                               | 16 (30.2%)                | 8 (53.3%)                 | 8 (47.1%)                 |                |
| NHL                                               | 28 (53.8%)                | 5 (33.3%)                 | 5 (29.4%)                 |                |
| other                                             | 8 (15.4%)                 | 2 (13.3%)                 | 4 (23.5%)                 |                |
| <b>Age at diagnosis of hematologic malignancy</b> |                           |                           |                           | 0.81           |
| Median (IQR)                                      | 68.0 years<br>(58.7;76.0) | 66.0 years<br>(59.2;73.0) | 68.0 years<br>(46.7;73.0) |                |

Characteristics of the total n=84 patient cohort. Percentages are given per column. MM, malignant melanoma; cSCC, cutaneous squamous cell carcinoma; MCC, Merkel cell carcinoma. Hematologic malignancies were categorized as chronic lymphocytic leukemia (CLL), other non-Hodgkin lymphoma (NHL), and other (comprising all other entities not belonging to the previous two categories). IQR, inter-quartile range.

**Table S2: Treatment of hematologic malignancy**

|                                                  | <b>CLL<br/>N (%)</b> | <b>NHL<br/>N (%)</b> | <b>Other<br/>N (%)</b> | <b>P-value</b> |
|--------------------------------------------------|----------------------|----------------------|------------------------|----------------|
| <b>Total</b>                                     | 32 (100%)            | 38 (100%)            | 14 (100%)              |                |
| <b>Treatment of hematologic malignancy</b>       |                      |                      |                        | 0.008          |
| no                                               | 23 (71.9%)           | 16 (42.1%)           | 4 (28.6%)              |                |
| yes                                              | 9 (28.1%)            | 22 (57.9%)           | 10 (71.4%)             |                |
| <b>Number of therapy lines</b>                   |                      |                      |                        | 0.16           |
| 0                                                | 23 (71.9%)           | 16 (42.1%)           | 4 (28.6%)              |                |
| 1-3                                              | 9 (29.1%)            | 16 (42.1%)           | 10 (71.4%)             |                |
| 4-7                                              | 0 (0.0%)             | 6 (15.7%)            | 0 (0.0%)               |                |
| <b>Chemotherapy</b>                              |                      |                      |                        | 0.047          |
| no                                               | 23 (71.9%)           | 14 (36.8%)           | 7 (50.0%)              |                |
| yes                                              | 8 (25.0%)            | 21 (55.7%)           | 7 (50.0%)              |                |
| unknown                                          | 1 (3.1%)             | 3 (7.9%)             | 0 (0.0%)               |                |
| <b>Corticosteroids</b>                           |                      |                      |                        | 0.044          |
| no                                               | 28 (87.5%)           | 21 (55.3%)           | 11 (78.6%)             |                |
| yes                                              | 3 (9.4%)             | 14 (36.8%)           | 3 (21.4%)              |                |
| unknown                                          | 1 (3.1%)             | 3 (7.9%)             | 0 (0.0%)               |                |
| <b>Rituximab</b>                                 |                      |                      |                        | <0.001         |
| no                                               | 27 (84.4%)           | 18 (47.4%)           | 14 (100.0%)            |                |
| yes                                              | 4 (12.5%)            | 17 (44.7%)           | 0 (0.0%)               |                |
| unknown                                          | 1 (3.1%)             | 3 (7.9%)             | 0 (0.0%)               |                |
| <b>Radiotherapy</b>                              |                      |                      |                        | 0.095          |
| no                                               | 30 (94.1%)           | 27 (71.1%)           | 13 (92.5%)             |                |
| yes                                              | 1 (3.1%)             | 8 (21.1%)            | 1 (7.1%)               |                |
| unknown                                          | 1 (3.1%)             | 3 (7.9%)             | 0 (0.0%)               |                |
| <b>Cell transplantation</b>                      |                      |                      |                        | 0.35           |
| no                                               | 31 (94.1%)           | 32 (84.2%)           | 13 (92.5%)             |                |
| yes                                              | 0 (0.0%)             | 3 (7.9%)             | 1 (7.1%)               |                |
| unknown                                          | 1 (3.1%)             | 3 (7.9%)             | 0 (0.0%)               |                |
| <b>Ongoing treatment at start of ICI therapy</b> |                      |                      |                        | 0.19           |
| no                                               | 31 (96.9%)           | 37 (97.4%)           | 12 (85.7%)             |                |
| yes                                              | 1 (3.1%)             | 1 (2.6%)             | 2 (14.3%)              |                |

Presented are all disease-specific therapies given to the total of n=84 studied patients for hematologic malignancy until the start of ICI treatment for skin cancer. Hematologic malignancies were categorized as chronic lymphocytic leukemia (CLL), other non-Hodgkin lymphoma (NHL), and other (comprising all other entities not belonging to the previous two categories). Percentages are given per column. More than one treatment per patient is possible, therefore numbers do not necessarily add up to 100%. ICI, immune checkpoint inhibition.

**TABLE S3: Characteristics of skin cancer disease at start of ICI therapy**

|                                                    | <b>MM<br/>N (%)</b> | <b>cSCC<br/>N (%)</b> | <b>MCC<br/>N (%)</b> | <b>P-value</b> |
|----------------------------------------------------|---------------------|-----------------------|----------------------|----------------|
| <b>Total</b>                                       | 52 (100%)           | 15 (100%)             | 17 (100%)            |                |
| <b>Stage of disease and tumor load</b>             |                     |                       |                      | 0.08           |
| locally advanced, measurable disease               | 3 (5.8%)            | 4 (26.7%)             | 0 (0.0%)             |                |
| locally advanced, disease-free after surgery       | 0 (0.0%)            | 0 (0.0%)              | 1 (5.9%)             |                |
| metastatic, measurable disease                     | 41 (78.8%)          | 11 (73.3%)            | 16 (94.1%)           |                |
| metastatic, disease-free after surgery             | 8 (15.4%)           | 0 (0.0%)              | 0 (0.0%)             |                |
| <b>Indication of treatment</b>                     |                     |                       |                      | 0.18           |
| adjuvant                                           | 8 (15.4%)           | 0 (0.0%)              | 1 (5.9%)             |                |
| inoperable disease                                 | 44 (84.6%)          | 15 (100%)             | 16 (94.1%)           |                |
| <b>Sites of measurable disease</b>                 |                     |                       |                      | 0.002          |
| skin                                               | 3 (5.8%)            | 3 (20.0%)             | 0 (0.0%)             |                |
| LN                                                 | 3 (5.8%)            | 5 (33.3%)             | 7 (41.2%)            |                |
| visceral                                           | 38 (73.1%)          | 7 (46.7%)             | 9 (52.9%)            |                |
| none                                               | 8 (15.4%)           | 0 (0.0%)              | 1 (5.9%)             |                |
| <b>LDH (serum)</b>                                 |                     |                       |                      | 0.28           |
| normal ( $\leq$ ULN)                               | 34 (65.4%)          | 8 (53.3%)             | 7 (41.2%)            |                |
| elevated ( $>$ ULN)                                | 16 (30.8%)          | 6 (40.0%)             | 10 (58.8%)           |                |
| unknown                                            | 2 (3.8%)            | 1 (6.7%)              | 0 (0.0%)             |                |
| <b>Systemic pre-treatment of skin cancer</b>       |                     |                       |                      | 0.29           |
| yes                                                | 6 (11.5%)           | 6 (40.0%)             | 3 (17.6%)            |                |
| no                                                 | 46 (88.5%)          | 9 (60.0%)             | 14 (82.4%)           |                |
| <b>Pre-treatment: chemotherapy</b>                 |                     |                       |                      | 0.39           |
| yes                                                | 3 (5.7%)            | 3 (20.0%)             | 3 (17.6%)            |                |
| no                                                 | 49 (94.2%)          | 12 (80.0%)            | 14 (82.4%)           |                |
| <b>Pre-treatment: targeted/other</b>               |                     |                       |                      | 0.3            |
| yes                                                | 3 (5.7%)            | 3 (20.0%)             | 0 (0.0%)             |                |
| no                                                 | 49 (94.2%)          | 12 (80.0%)            | 17 (100.0%)          |                |
| <b>Lines of systemic pre-treatment</b>             |                     |                       |                      | 0.32           |
| 1                                                  | 5 (9.6%)            | 4 (26.7%)             | 1 (5.9%)             |                |
| $\geq 2$                                           | 1 (1.9%)            | 2 (13.3%)             | 2 (11.8%)            |                |
| <b>Pre-treatment: radiotherapy</b>                 |                     |                       |                      | 0.031          |
| yes                                                | 9 (17.0%)           | 8 (53.3%)             | 8 (47.1%)            |                |
| no                                                 | 43 (82.7%)          | 7 (46.7%)             | 9 (52.9%)            |                |
| <b>Ongoing treatment of hematologic malignancy</b> |                     |                       |                      | 0.24           |
| yes                                                | 1 (1.9%)            | 1 (6.7%)              | 2 (11.8%)            |                |
| no                                                 | 51 (98.1%)          | 14 (93.3%)            | 15 (88.2%)           |                |

The presented characteristics of skin cancer disease refer to the start of ICI therapy in the total cohort of n=84 patients. Percentages are given per column. ICI, immune checkpoint inhibition; MM, malignant melanoma; cSCC, cutaneous squamous cell carcinoma; MCC, Merkel cell carcinoma; LN, lymph node; LDH, lactate dehydrogenase; ULN, upper limit of normal.

**Table S4: Staging of hematologic malignancy at start of ICI therapy**

|                                                 | CLL     |                  | NHL           |                  |
|-------------------------------------------------|---------|------------------|---------------|------------------|
|                                                 | Stage   | N (%)            | Stage         | N (%)            |
| <b>All patients</b>                             |         | 30               |               | 32               |
| <b>Melanoma (MM)</b>                            |         |                  |               |                  |
| <b>Total</b>                                    |         | <b>14 (100%)</b> |               | <b>23 (100%)</b> |
|                                                 | Binet A | 5                | Ann Arbor I   | 3                |
|                                                 | Binet B | 4                | Ann Arbor II  | 1                |
|                                                 | Binet C | 4                | Ann Arbor III | 6                |
|                                                 |         |                  | Ann Arbor IV  | 2                |
| Missing data                                    |         | 1                |               | 11               |
| <b>Cutaneous squamous cell carcinoma (cSCC)</b> |         |                  |               |                  |
| <b>Total</b>                                    |         | <b>8 (100%)</b>  |               | <b>5 (100%)</b>  |
|                                                 | Binet A | 2                | Ann Arbor I   | 1                |
|                                                 | Binet B | 2                | Ann Arbor II  | 0                |
|                                                 | Binet C | 3                | Ann Arbor III | 2                |
|                                                 |         |                  | Ann Arbor IV  | 0                |
| Missing data                                    |         | 1                |               | 2                |
| <b>Merkel cell carcinoma (MCC)</b>              |         |                  |               |                  |
| <b>Total</b>                                    |         | <b>8 (100%)</b>  |               | <b>4 (100%)</b>  |
|                                                 | Binet A | 2                | Ann Arbor I   | 0                |
|                                                 | Binet B | 1                | Ann Arbor II  | 0                |
|                                                 | Binet C | 5                | Ann Arbor III | 2                |
|                                                 |         |                  | Ann Arbor IV  | 1                |
| Missing data                                    |         | 0                |               | 1                |

The stage of the concomitant hematologic malignancy at start of ICI therapy for non-resectable skin cancer is given as available from patient files. Staging is shown for the largest groups chronic lymphocytic leukemia (CLL), and other non-Hodgkin lymphoma (NHL).

**TABLE S5: Characteristics of skin cancer disease at start of ICI therapy**

|                                              | MM                     |                           | cSCC                   |                           | MCC                    |                           |
|----------------------------------------------|------------------------|---------------------------|------------------------|---------------------------|------------------------|---------------------------|
|                                              | Hematologic Malignancy | No Hematologic Malignancy | Hematologic Malignancy | No Hematologic Malignancy | Hematologic Malignancy | No Hematologic Malignancy |
|                                              | N (%)                  | N (%)                     | N (%)                  | N (%)                     | N (%)                  | N (%)                     |
| <b>Total</b>                                 | 52 (100%)              | 257 (100%)                | 15 (100%)              | 59 (100%)                 | 17 (100%)              | 76 (100%)                 |
| <b>Stage of disease and tumor load</b>       |                        |                           |                        |                           |                        |                           |
| locally advanced, measurable disease         | 3 (5.8%)               | 36 (14%)                  | 4 (26.7%)              | 23 (39.0%)                | 0 (0.0%)               | 0 (0.0%)                  |
| locally advanced, disease-free after surgery | 0 (0.0%)               | 0 (0.0%)                  | 0 (0.0%)               | 0 (0.0%)                  | 1 (5.9%)               | 0 (0.0%)                  |
| metastatic, measurable disease               | 41 (78.8%)             | 221 (86%)                 | 11 (73.3%)             | 36 (51.%)                 | 16 (94.1%)             | 76 (100%)                 |
| metastatic, disease-free after surgery       | 8 (15.4%)              | 0 (0.0%)                  | 0 (0.0%)               | 0 (0.0%)                  | 0 (0.0%)               | 0 (0.0%)                  |
| <b>Indication of treatment</b>               |                        |                           |                        |                           |                        |                           |
| adjuvant                                     | 8 (15.4%)              | 0 (0.0%)                  | 0 (0.0%)               | 0 (0.0%)                  | 1 (5.9%)               | 0 (0.0%)                  |
| inoperable disease                           | 44 (84.6%)             | 257 (100%)                | 15 (100%)              | 59 (100%)                 | 16 (94.1%)             | 76 (100%)                 |
| <b>Sites of measurable disease</b>           |                        |                           |                        |                           |                        |                           |
| skin                                         | 3 (5.8%)               | nr                        | 3 (20.0%)              | 23 (39.0%)                | 0 (0.0%)               | 7 (9.2%)                  |
| LN                                           | 3 (5.8%)               | nr                        | 5 (33.3%)              | 32 (54.2%)                | 7 (41.2%)              | 31 (40.7)                 |
| visceral                                     | 38 (73.1%)             | nr                        | 7 (46.7%)              | 4 (6.8%)                  | 9 (52.9%)              | 38 (50.0%)                |
| none                                         | 8 (15.4%)              | nr                        | 0 (0.0%)               | 0 (0.0%)                  | 1 (5.9%)               | 0 (0.0%)                  |
| <b>LDH (serum)</b>                           |                        |                           |                        |                           |                        |                           |
| normal ( $\leq$ ULN)                         | 34 (65.4%)             | 226 (87.9%)               | 8 (53.3%)              | 44 (74.6%)                | 7 (41.2%)              | 31 (40.8%)                |
| elevated ( $>$ ULN)                          | 16 (30.8%)             | 31 (12.1%)                | 6 (40.0%)              | 13 (22.0%)                | 10 (58.8%)             | 42 (55.3%)                |
| unknown                                      | 2 (3.8%)               | 0 (0.0%)                  | 1 (6.7%)               | 2 (3.4%)                  | 0 (0.0%)               | 3 (3.9%)                  |
| <b>Systemic pre-treatment of skin cancer</b> |                        |                           |                        |                           |                        |                           |
| yes                                          | 6 (11.5%)              | 0 (0.0%)                  | 6 (40.0%)              | 18 (30.5%)                | 3 (17.6%)              | 25 (32.9%)                |
| no                                           | 46 (88.5%)             | 257 (100%)                | 9 (60.0%)              | 41 (69.5%)                | 14 (82.4%)             | 51 (67.1%)                |
| <b>Pre-treatment: chemotherapy</b>           |                        |                           |                        |                           |                        |                           |
| yes                                          | 3 (5.7%)               | 0 (0.0%)                  | 3 (20.0%)              | 18 (30.5%)                | 3 (17.6%)              | 25 (32.9%)                |
| no                                           | 49 (94.2%)             | 257 (100%)                | 12 (80.0%)             | 41 (69.5%)                | 14 (82.4%)             | 51 (67.1%)                |
| <b>Pre-treatment: targeted/other</b>         |                        |                           |                        |                           |                        |                           |
| yes                                          | 3 (5.7%)               | 0 (0.0%)                  | 3 (20.0%)              | 8 (13.6%)                 | 0 (0.0%)               | 4 (5.3%)                  |
| no                                           | 49 (94.2%)             | 257 (100%)                | 12 (80.0%)             | 51 (86.4%)                | 17 (100.0%)            | 72 (94.7%)                |
| <b>Pre-treatment: radiotherapy</b>           |                        |                           |                        |                           |                        |                           |
| yes                                          | 9 (17.0%)              | 9 (3.5%)                  | 8 (53.3%)              | 23 (39.0%)                | 8 (47.1%)              | 42 (55.3%)                |
| no                                           | 43 (82.7%)             | 248 (96.5%)               | 7 (46.7%)              | 36 (61.0%)                | 9 (52.9%)              | 34 (44.7%)                |

The presented characteristics of skin cancer disease refer to the start of ICI therapy in the cohort of n=84 patients with concomitant hematologic malignancy as well as n=392 patients without concomitant hematologic malignancy. Percentages are given per column. ICI, immune checkpoint inhibition; MM, malignant melanoma; cSCC, cutaneous squamous cell carcinoma; MCC, Merkel cell carcinoma; LN, lymph node; LDH, lactate dehydrogenase; ULN, upper limit of normal; nr, not reported.

**Table S6: Best response to ICI therapy for non-resectable skin cancer**

|                                                 | CLL              | NHL              | other           | P-value |
|-------------------------------------------------|------------------|------------------|-----------------|---------|
|                                                 | N (%)            | N (%)            | N (%)           |         |
| <b>All patients</b>                             | 30               | 32               | 13              |         |
| <b>Melanoma (MM)</b>                            |                  |                  |                 | 0.48    |
| <b>Total</b>                                    | <b>14 (100%)</b> | <b>23 (100%)</b> | <b>7 (100%)</b> |         |
| CR                                              | 1 (7.1%)         | 1 (7.1%)         | 0 (0.0%)        |         |
| PR                                              | 3 (21.4%)        | 6 (21.4%)        | 3 (42.9%)       |         |
| SD                                              | 5 (35.7%)        | 4 (14.2%)        | 2 (28.6%)       |         |
| PD                                              | 5 (35.7%)        | 7 (35.7%)        | 2 (28.6%)       |         |
| NE                                              | 0 (0.0%)         | 5 (21.4%)        | 0 (0.0%)        |         |
| objective response (CR+PR)                      | 4 (28.6%)        | 7 (28.6%)        | 3 (42.8%)       |         |
| disease control (CR+PR+SD)                      | 9 (64.2%)        | 11 (42.8%)       | 5 (71.4%)       |         |
| <b>Cutaneous squamous cell carcinoma (cSCC)</b> |                  |                  |                 | 0.29    |
| <b>Total</b>                                    | <b>8 (100%)</b>  | <b>5 (100%)</b>  | <b>2 (100%)</b> |         |
| CR                                              | 1 (12.5%)        | 0 (0.0%)         | 0 (0.0%)        |         |
| PR                                              | 1 (12.5%)        | 2 (40.0%)        | 0 (0.0%)        |         |
| SD                                              | 2 (25.0%)        | 1 (20.0%)        | 1 (50.0%)       |         |
| PD                                              | 4 (50.0%)        | 2 (40.0%)        | 1 (50.0%)       |         |
| NE                                              | 0 (0.0%)         | 0 (0.0%)         | 0 (0.0%)        |         |
| objective response (CR+PR)                      | 2 (25.0%)        | 2 (40.0%)        | 0 (0.0%)        |         |
| disease control (CR+PR+SD)                      | 4 (50.0%)        | 3 (60.0%)        | 1 (50.0%)       |         |
| <b>Merkel cell carcinoma (MCC)</b>              |                  |                  |                 | 0.28    |
| <b>Total</b>                                    | <b>8 (100%)</b>  | <b>4 (100%)</b>  | <b>4 (100%)</b> |         |
| CR                                              | 0 (0.0%)         | 0 (0.0%)         | 0 (0.0%)        |         |
| PR                                              | 1 (12.5%)        | 0 (0.0%)         | 2 (50.0%)       |         |
| SD                                              | 3 (37.5%)        | 1 (25.0%)        | 0 (0.0%)        |         |
| PD                                              | 4 (50.0%)        | 2 (50.0%)        | 2 (50.0%)       |         |
| NE                                              | 0 (0.0%)         | 1 (25.0%)        | 0 (0.0%)        |         |
| objective response (CR+PR)                      | 1 (12.5%)        | 0 (0.0%)         | 2 (50.0%)       |         |
| disease control (CR+PR+SD)                      | 4 (50.0%)        | 1 (25.0%)        | 2 (50.0%)       |         |

Response to ICI therapy is presented for n=75 patients treated for non-resectable skin cancer disease, subdivided by skin cancer entity and categorized concomitant hematologic malignancy. Hematologic malignancies were categorized as chronic lymphocytic leukemia (CLL), other non-Hodgkin lymphoma (NHL), and other (comprising all other entities not belonging to the previous two categories). Treatment response is presented as best overall response recorded from start of ICI until disease progression. ICI, immune checkpoint inhibition; CR, complete response; PR, partial response; SD, stable disease; PD, progressive disease; NE, not evaluable.

**TABLE S7. Blood counts of skin cancer patients with concomitant hematologic malignancy at start of ICI therapy**

|                     | <b>CLL</b>   | <b>NHL</b>   | <b>other</b> | <b>P-value</b>    |
|---------------------|--------------|--------------|--------------|-------------------|
|                     | <b>N (%)</b> | <b>N (%)</b> | <b>N (%)</b> |                   |
| <b>Total</b>        | 30 (100%)    | 32 (100%)    | 13 (100%)    |                   |
| <b>Leukocytes</b>   |              |              |              | <b>0.003</b>      |
| normal              | 15 (50.0%)   | 24 (75.0%)   | 5 (38.5%)    |                   |
| elevated            | 14 (46.7%)   | 3 (9.4%)     | 7 (53.8%)    |                   |
| decreased           | 1 (3.1%)     | 5 (15.6%)    | 1 (7.7%)     |                   |
| <b>Lymphocytes</b>  |              |              |              | <b>&lt;0.0001</b> |
| normal              | 8 (26.7%)    | 12 (37.5%)   | 6 (46.2%)    |                   |
| elevated            | 18 (60.0%)   | 5 (15.6%)    | 1 (7.7%)     |                   |
| decreased           | 4 (13.3%)    | 15 (46.9%)   | 6 (46.2%)    |                   |
| <b>Thrombocytes</b> |              |              |              | <b>0.01</b>       |
| normal              | 20 (66.7%)   | 23 (71.8%)   | 6 (46.2%)    |                   |
| elevated            | 1 (3.1%)     | 3 (9.4%)     | 6 (46.2%)    |                   |
| decreased           | 9 (30.0%)    | 6 (18.7%)    | 1 (7.7%)     |                   |

Blood counts at baseline of immune checkpoint inhibition (ICI) therapy are provided for n=75 patients treated for non-resectable skin cancer disease.
