# Supplementary material for: Immune checkpoint inhibition therapy for advanced skin cancer in patients with concomitant hematological malignancy: a retrospective multicenter DeCOG study of 84 patients
Source: PubMed Central journal article supplement — J Immunother Cancer. 2020 Oct 22;8(2):e000897. doi: 10.1136/jitc-2020-000897 (PMC7583786; doi:10.1136/jitc-2020-000897), 2020-10-22
Supplement: jitc-2020-000897supp002.pdf [file jitc-2020-000897supp002.pdf]

## Immune checkpoint inhibition therapy for advanced skin cancer in patients with concomitant hematologic malignancy: a retrospective multicenter DeCOG study of 84 patients

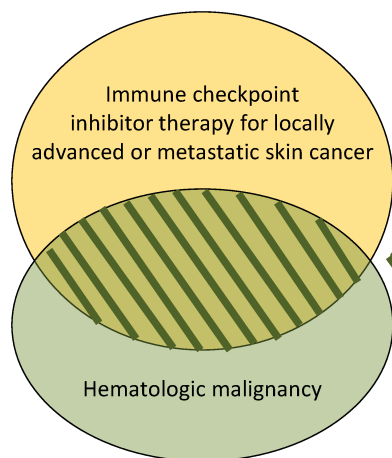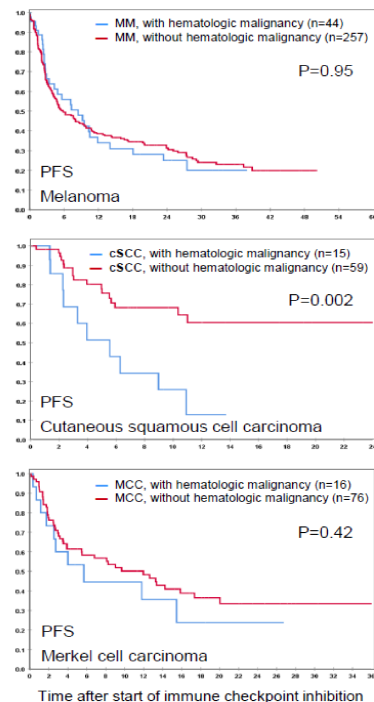

### Authors

Ulrike Leiter, Carmen Loquai, Lydia Reinhardt, David Rafei-Shamsabadi, Jessica C. Hassel, Valerie Glutsch, Judith Sirokay, Nora Schlecht, Albert Rübben, Ralf Gutzmer, Katharina C. Kähler, Thilo Gambichler, Kerstin Schatton, Claudia Pföhler, Cindy Franklin, Patrick Terheyden, Sebastian Haferkamp, Peter Mohr, Lucie Heinzerling, Lena Bischof, Elisabeth Livingstone, Lisa Zimmer, Michael Weichenthal, Dirk Schadendorf, Andreas Meiwes, Ulrike Keim, Claus Garbe, Jürgen C. Becker, Selma Ugurel

### Correspondence

selma.ugurel@uk-essen.de

### In Brief

This retrospective multicenter study investigated 84 patients who were treated with immune checkpoint inhibition therapy for advanced skin cancer and had a previous diagnosis of hematologic malignancy. 392 patients without hematologic malignancy from the prospective multicenter skin cancer registry ADOREG were used as comparators. In patients with hematologic malignancy as compared to patients without, the outcome of immune checkpoint inhibition therapy was impaired for cutaneous squamous cell carcinoma, but not for melanoma and Merkel cell carcinoma.
